# Supplementary material
Source: PubMed Central journal article supplement (PMC6986928)

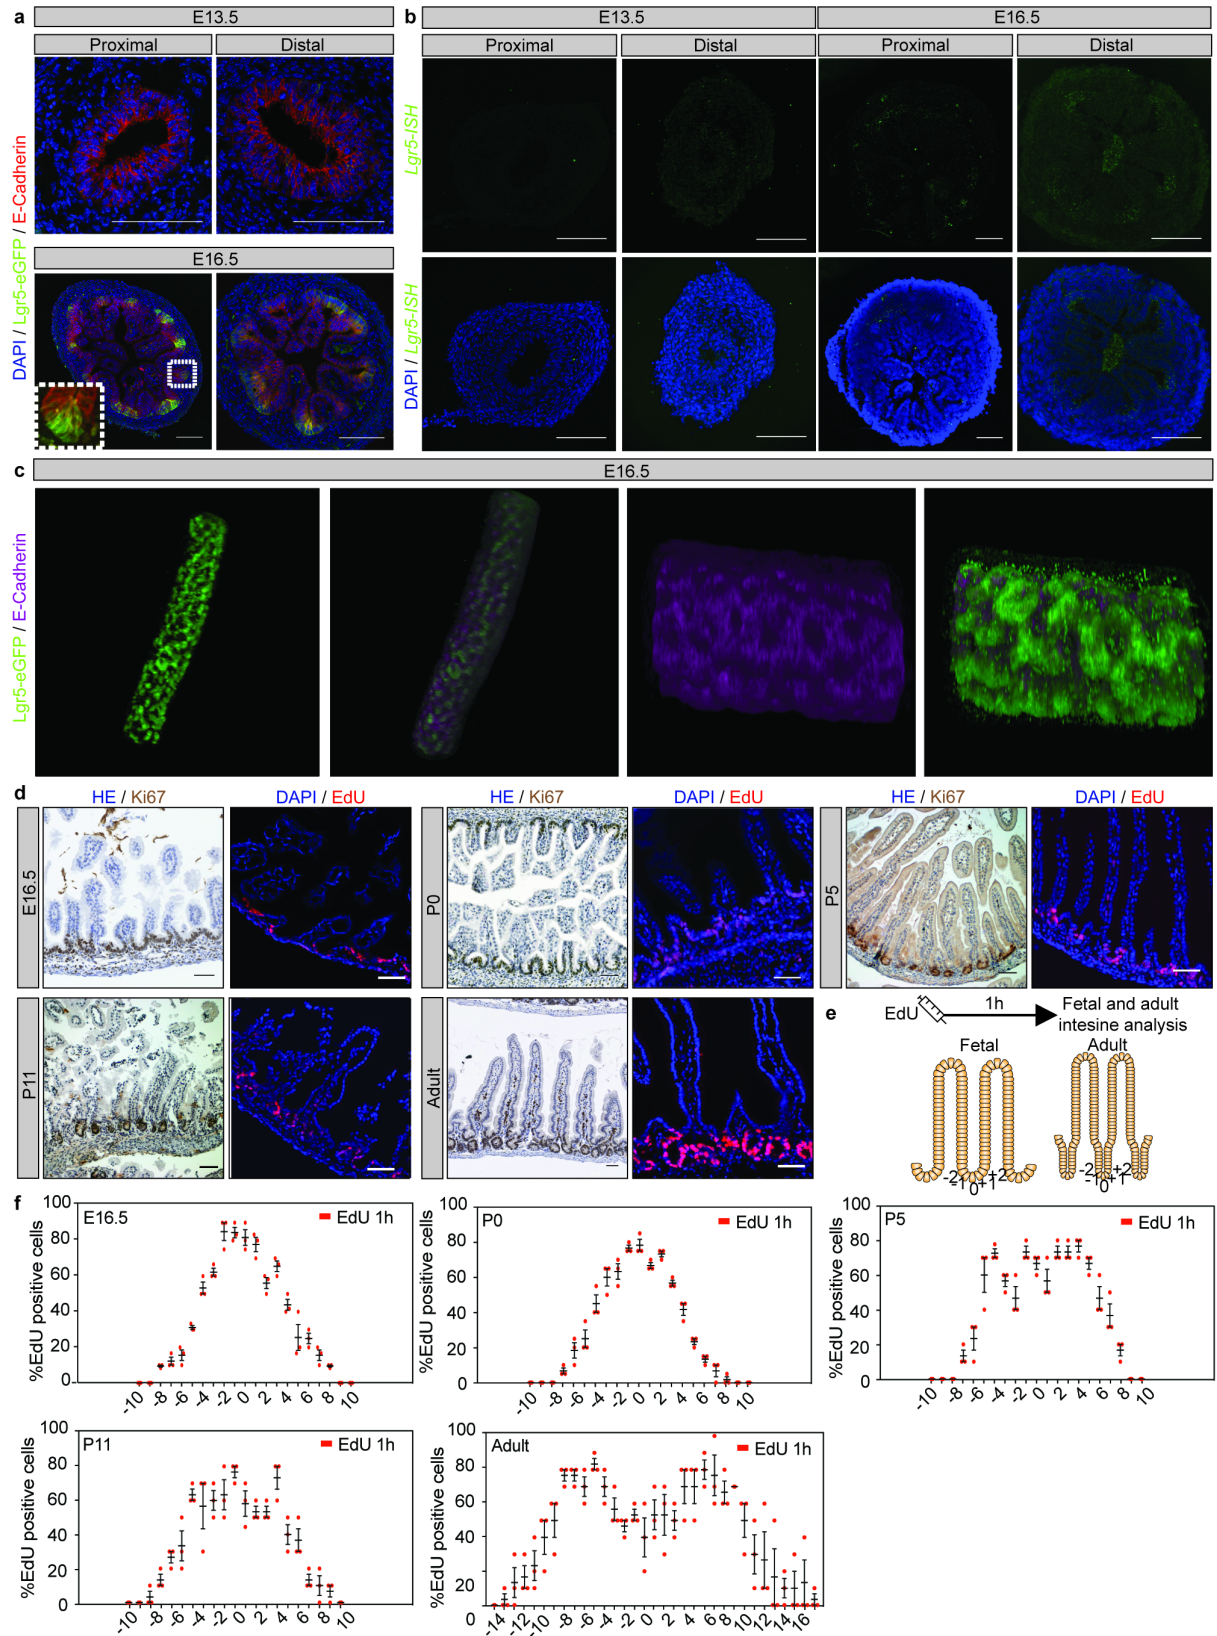

Supplement: EMS85477-supplement-fig__s1.pdf [file EMS85477-supplement-fig__s1.pdf]

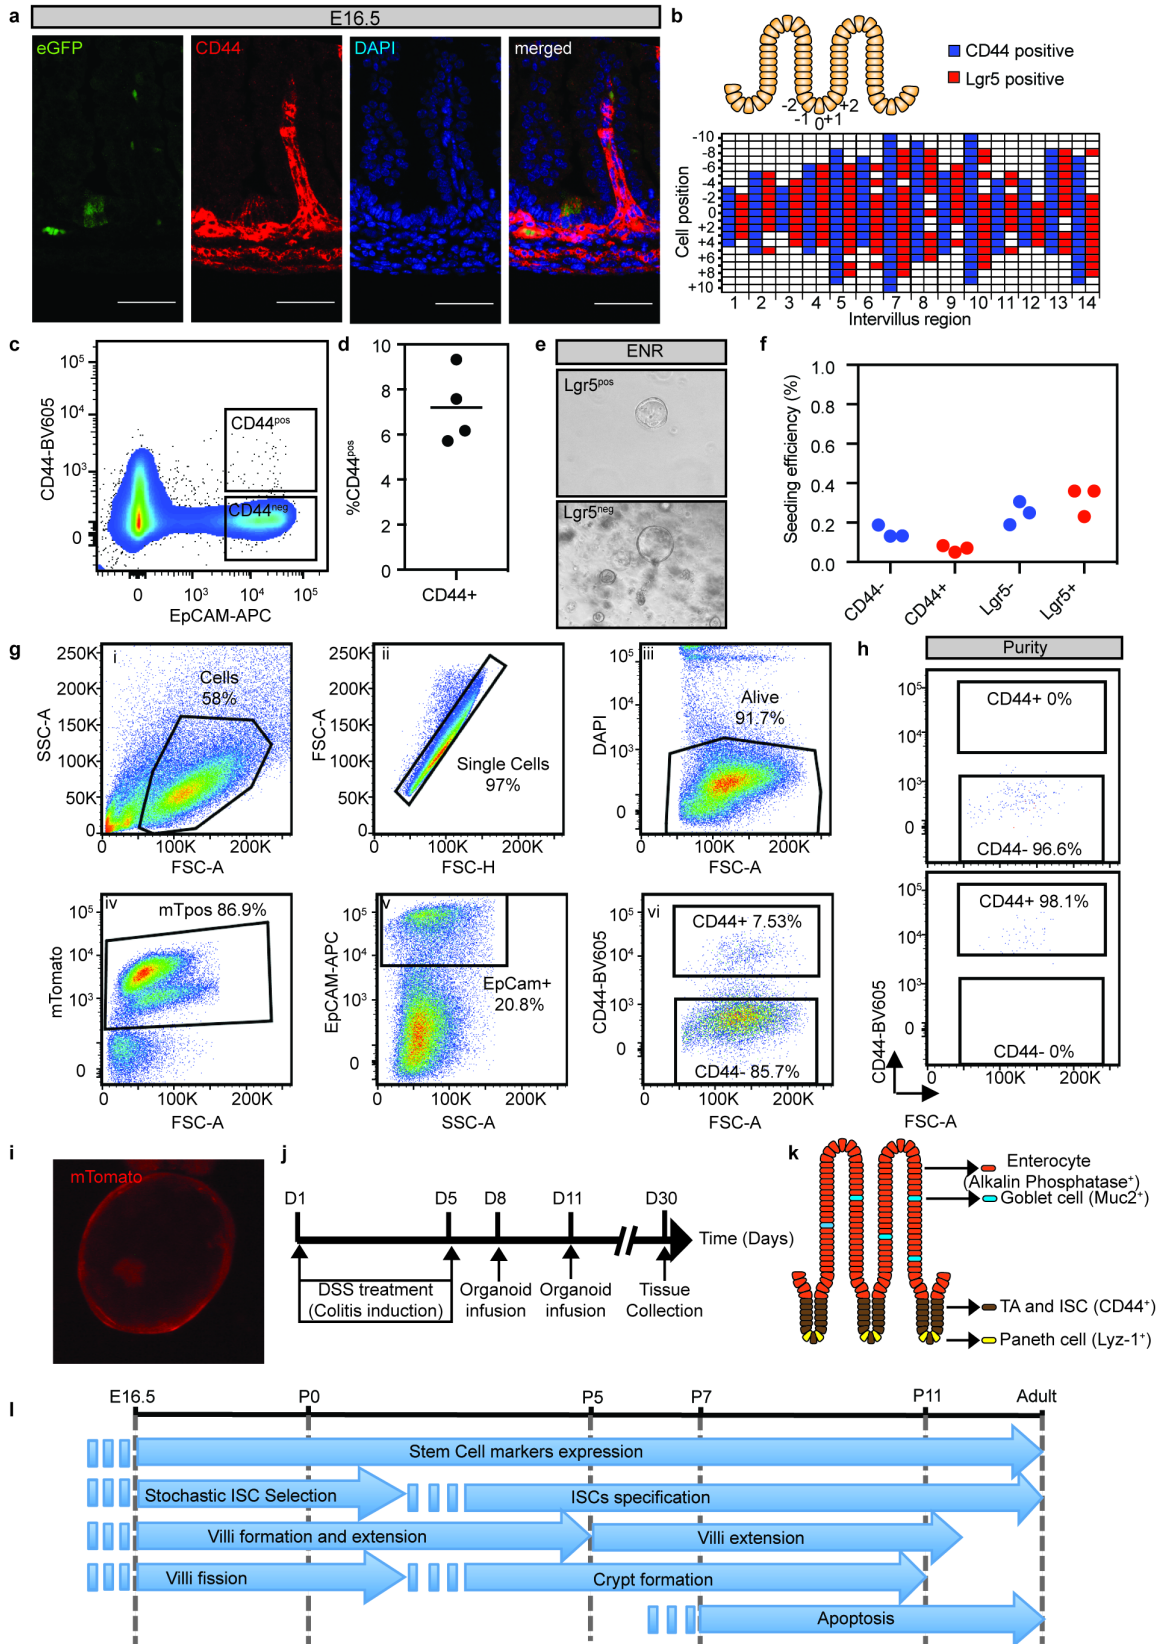

Supplement: EMS85477-supplement-fig__s10.pdf [file EMS85477-supplement-fig__s10.pdf]

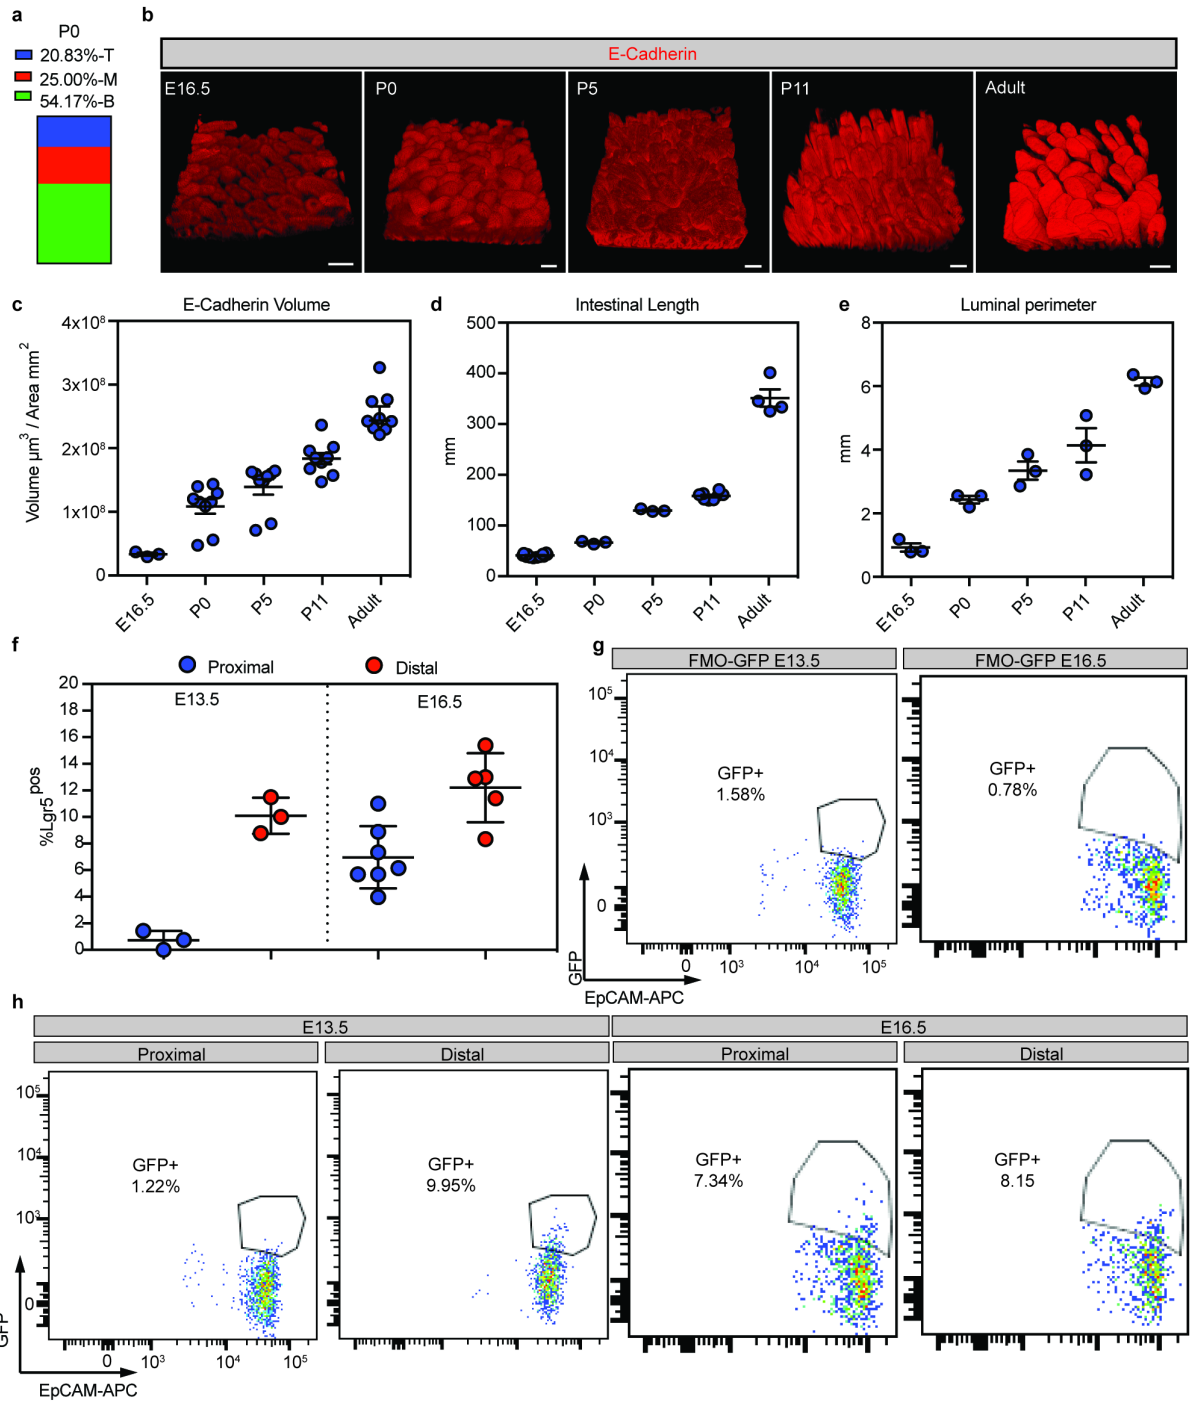

Supplement: EMS85477-supplement-fig__s2.pdf [file EMS85477-supplement-fig__s2.pdf]

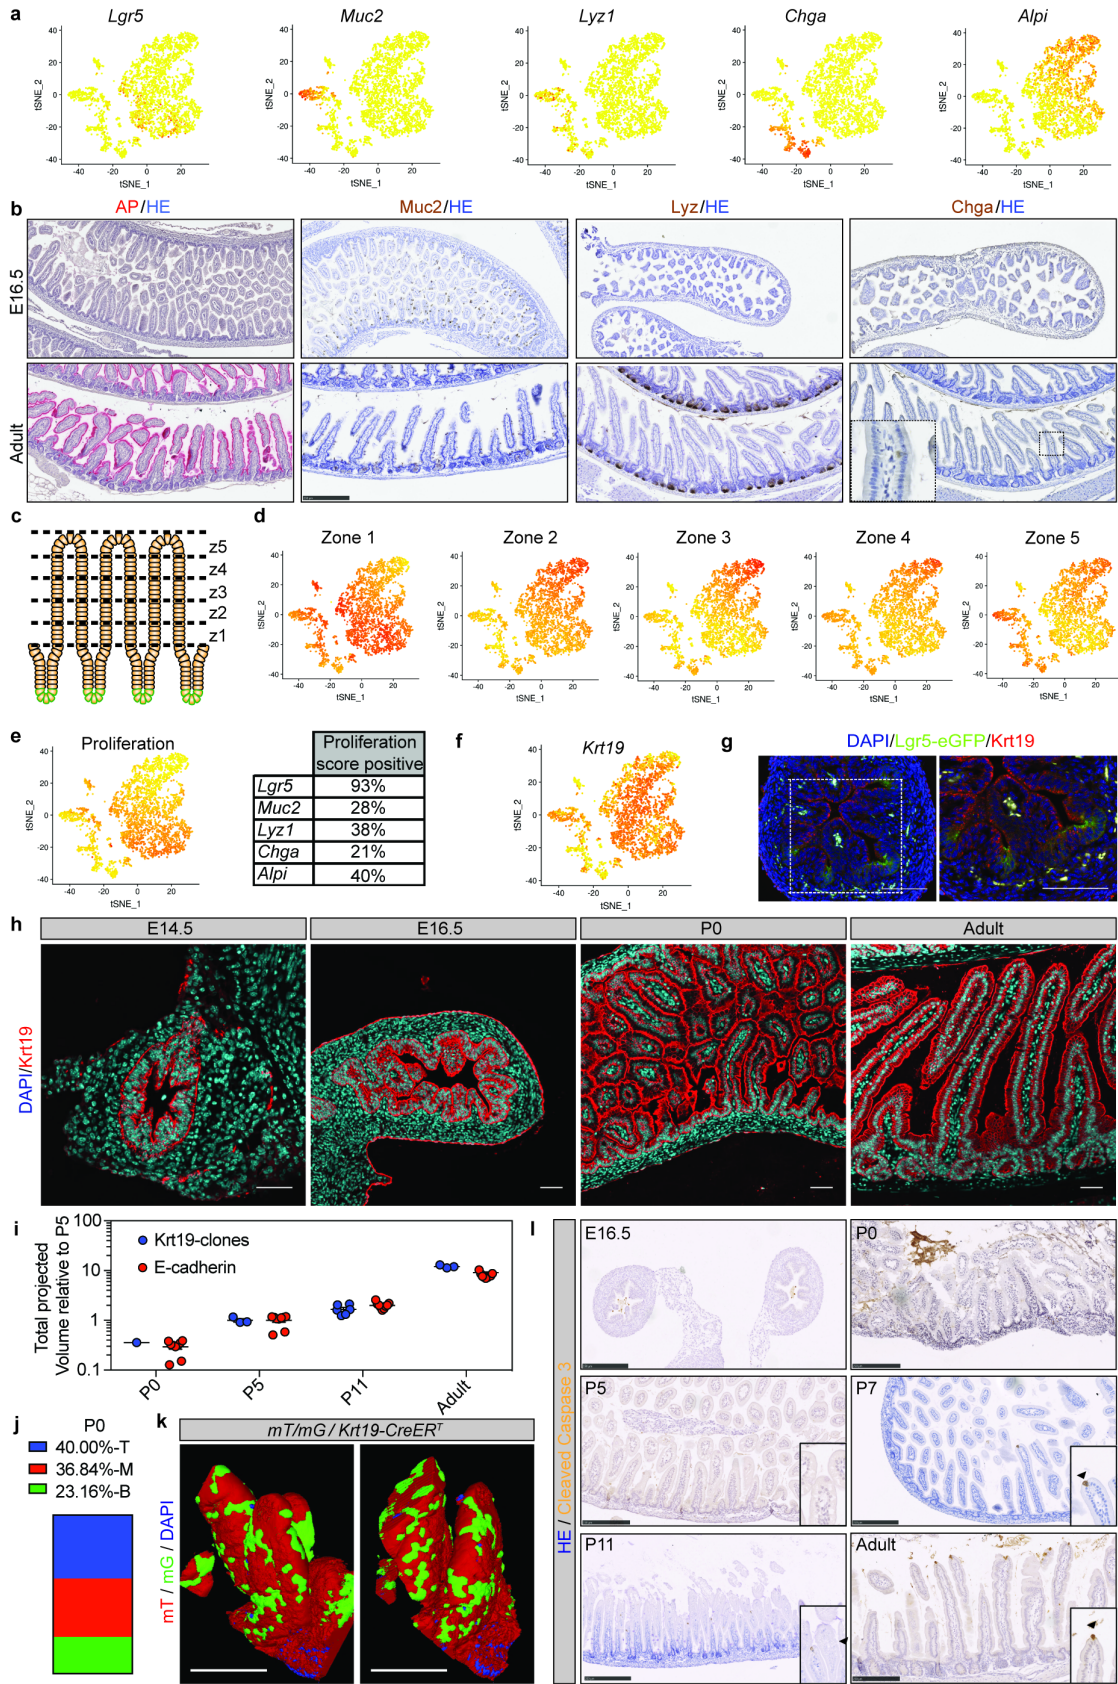

Supplement: EMS85477-supplement-fig__s3.pdf [file EMS85477-supplement-fig__s3.pdf]

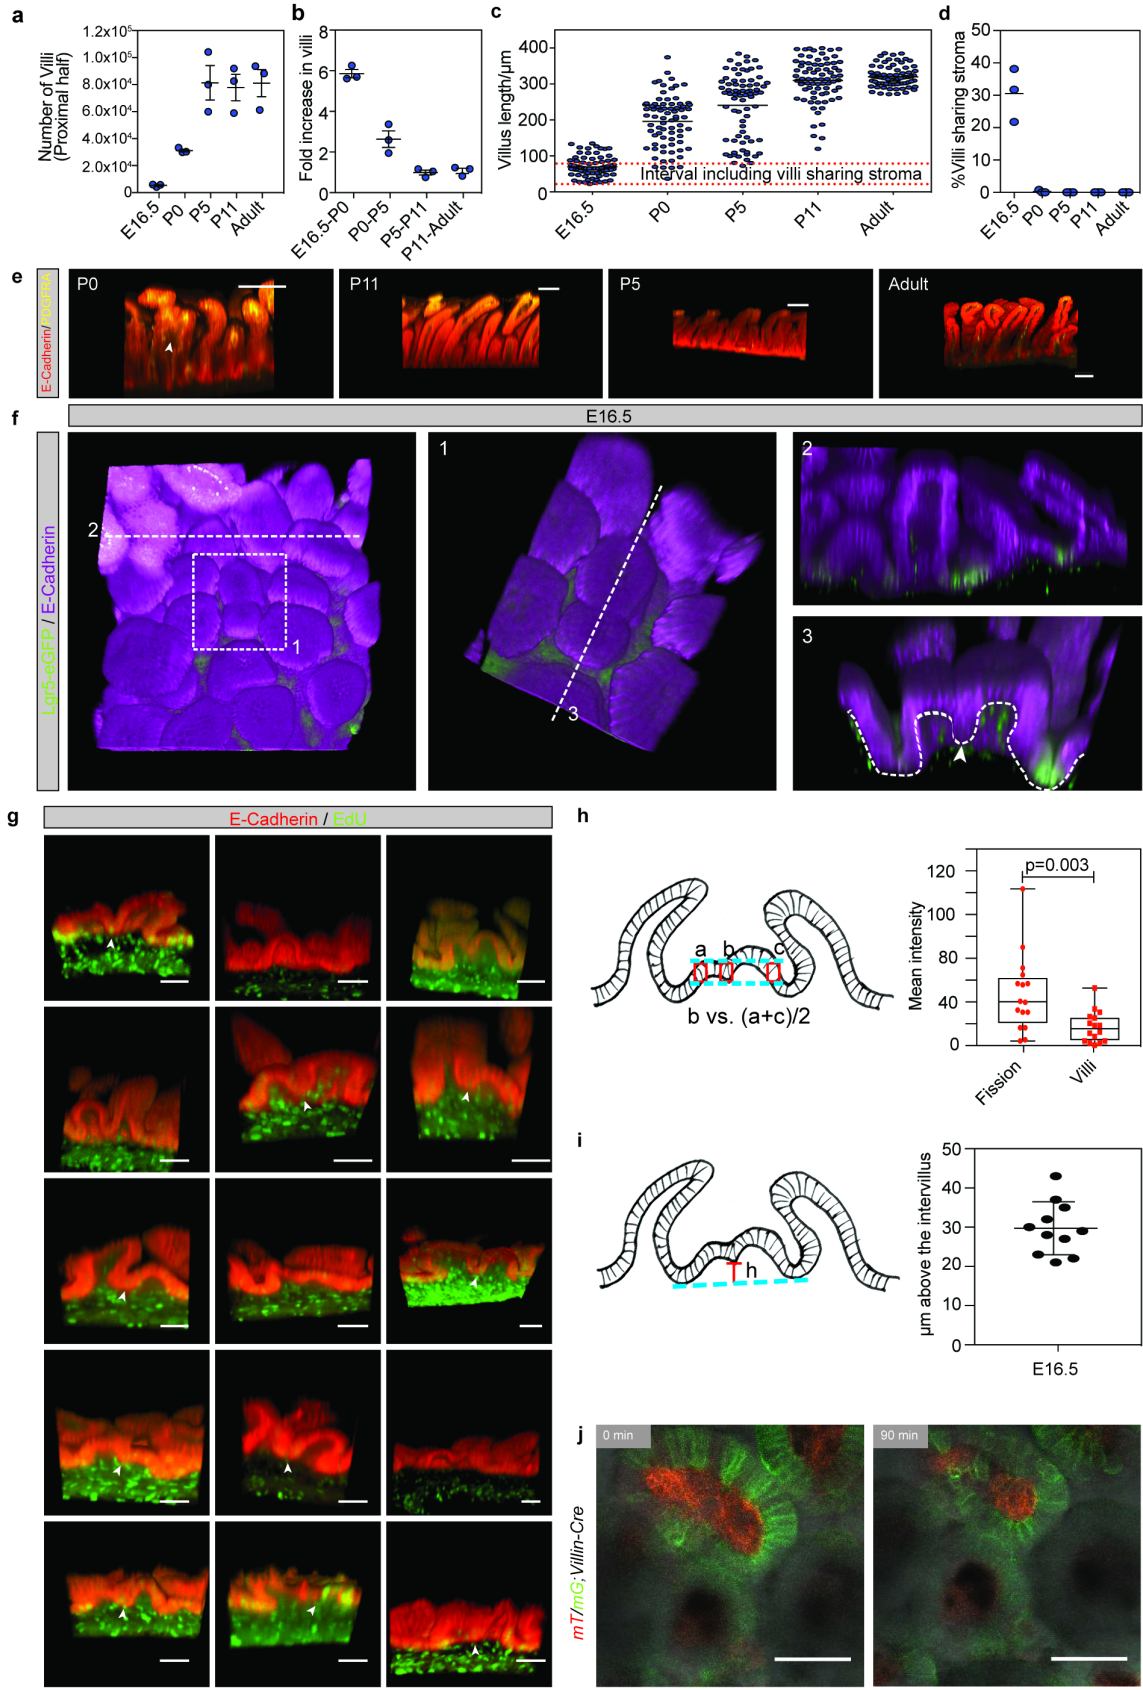

Supplement: EMS85477-supplement-fig__s4.pdf [file EMS85477-supplement-fig__s4.pdf]

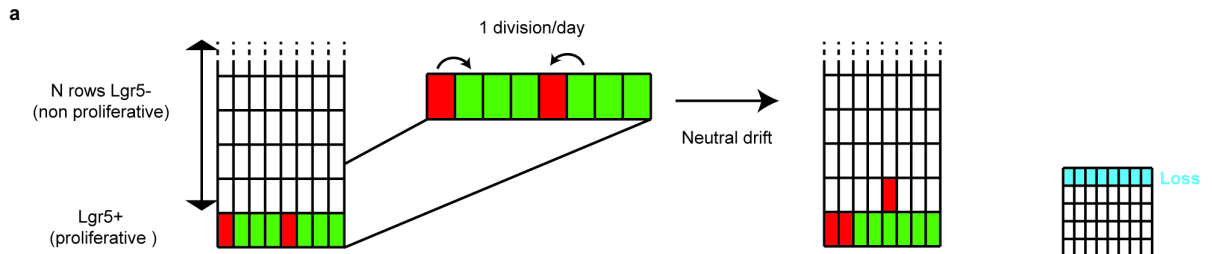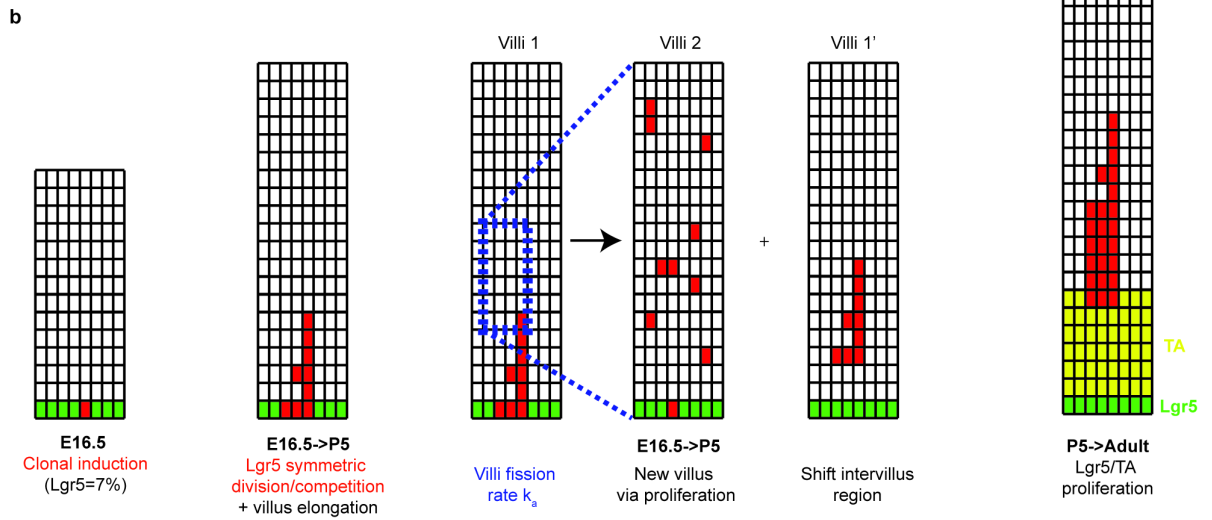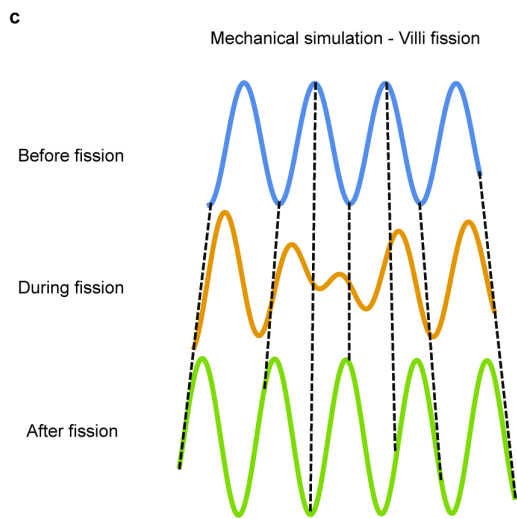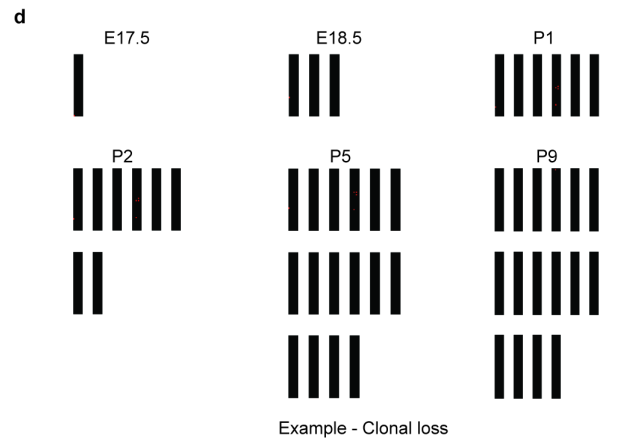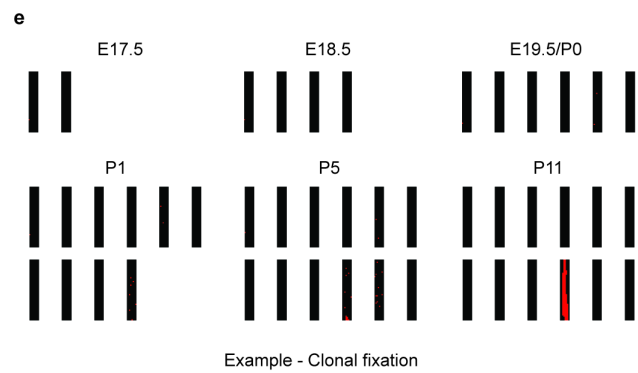

Supplement: EMS85477-supplement-fig__s5.pdf [file EMS85477-supplement-fig__s5.pdf]

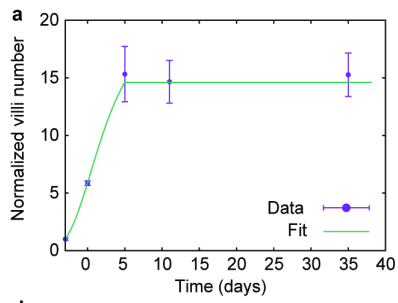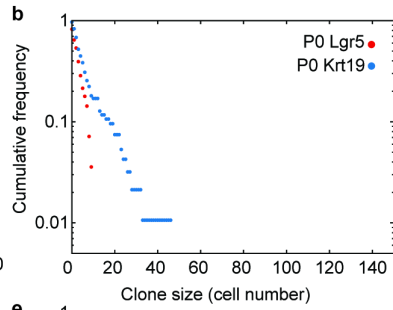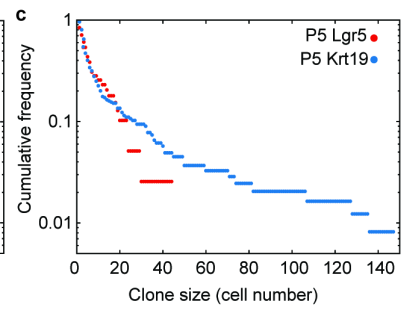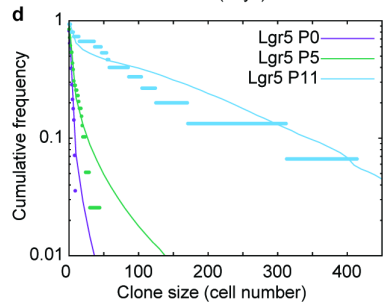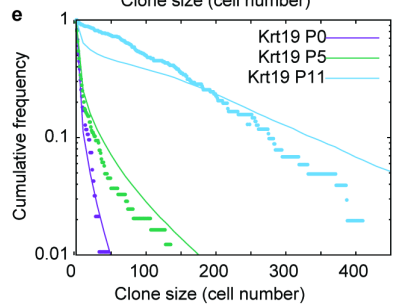

Supplement: EMS85477-supplement-fig__s6.pdf [file EMS85477-supplement-fig__s6.pdf]

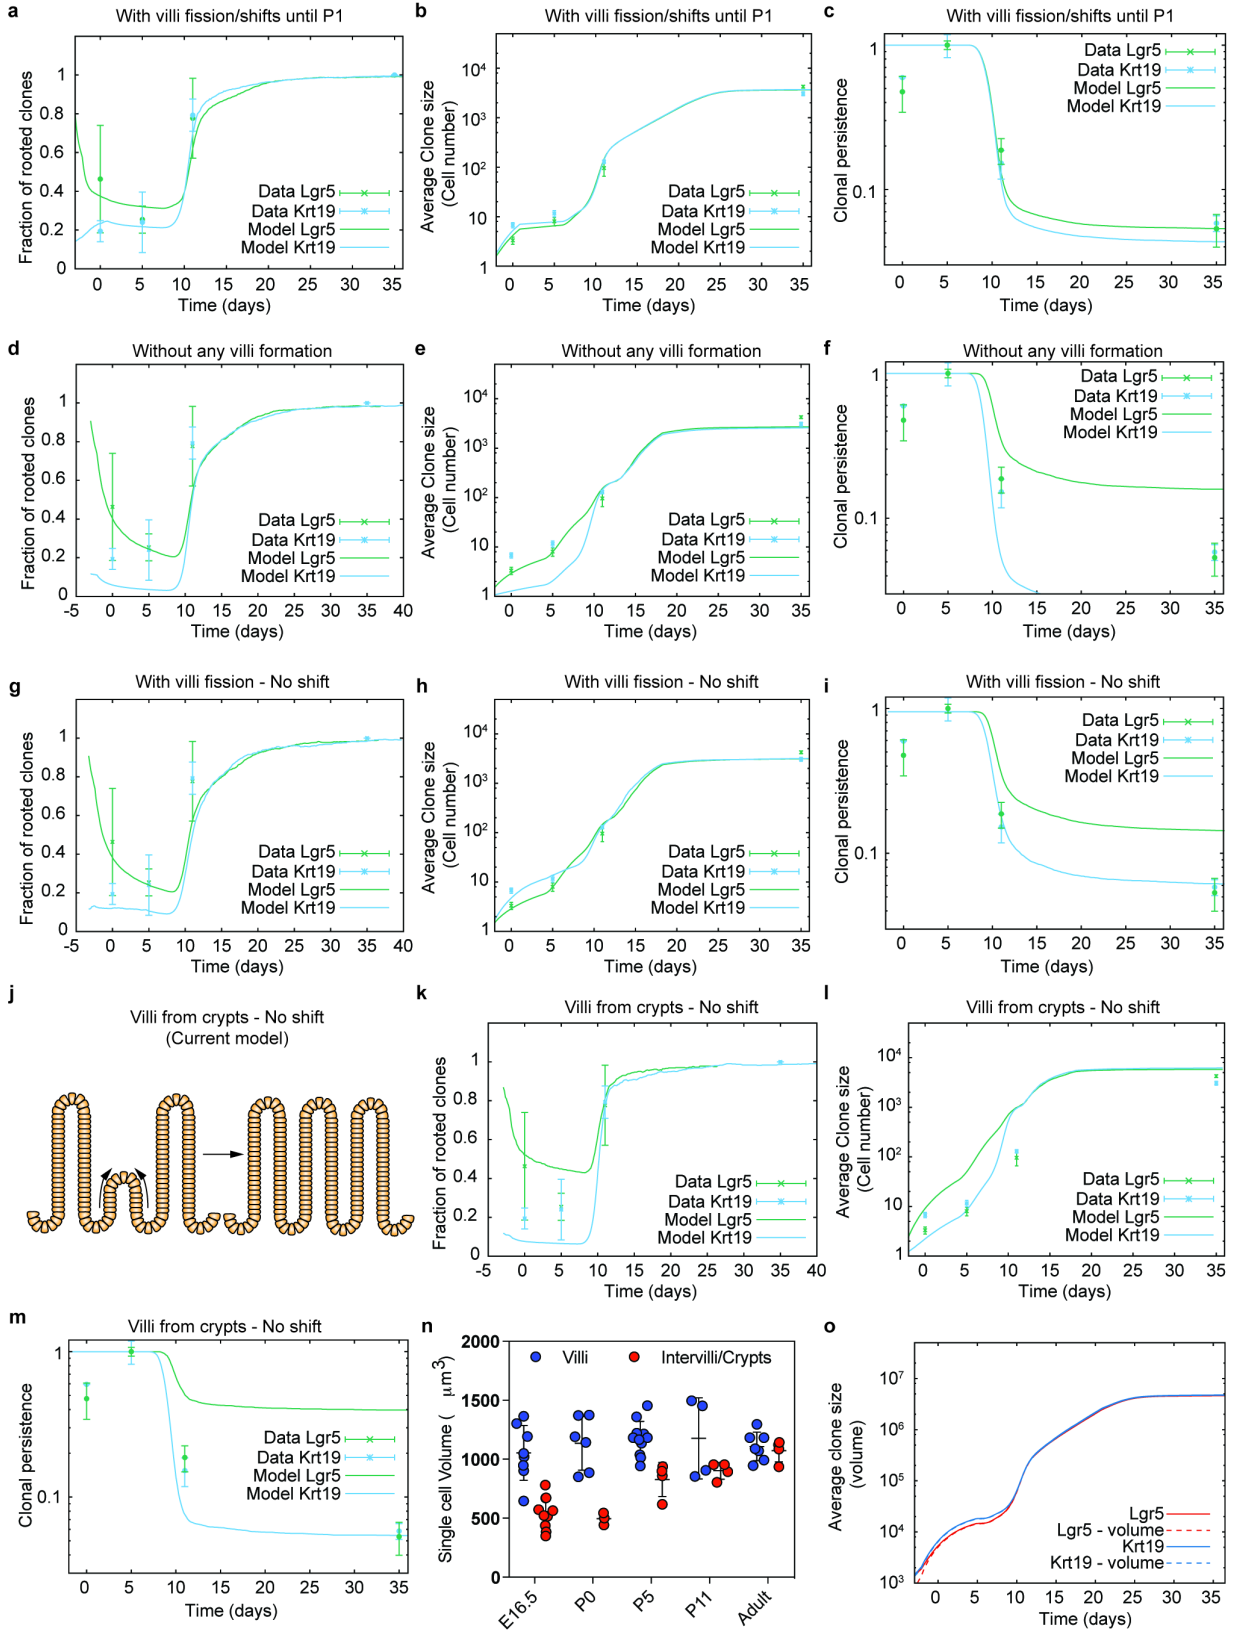

Supplement: EMS85477-supplement-fig__s7.pdf [file EMS85477-supplement-fig__s7.pdf]

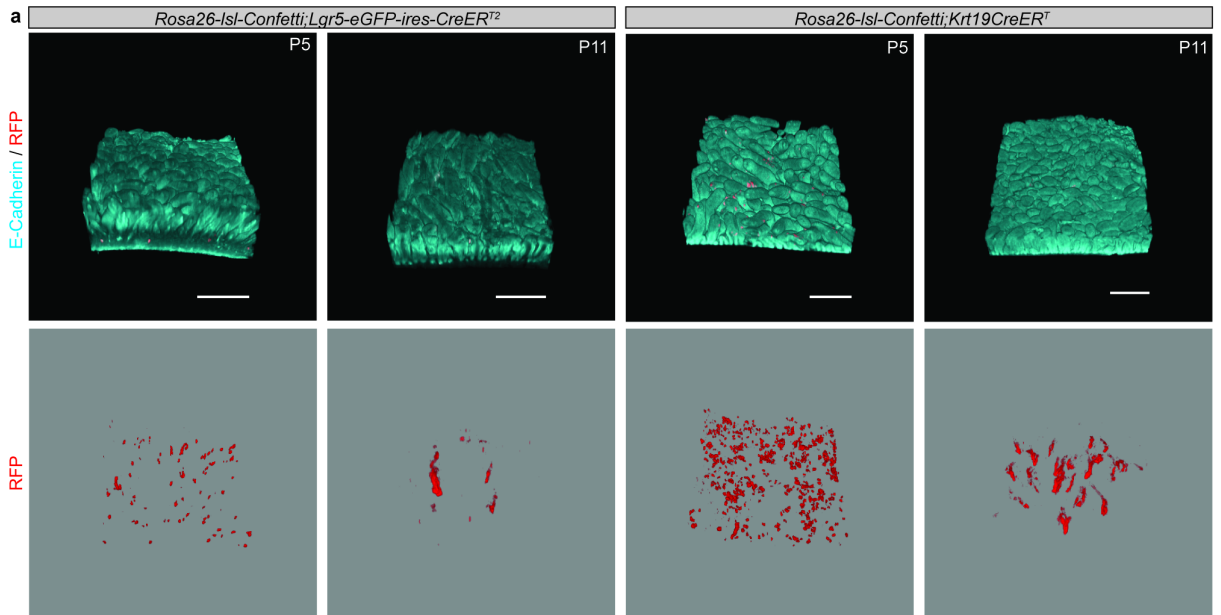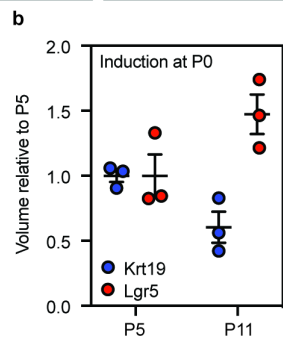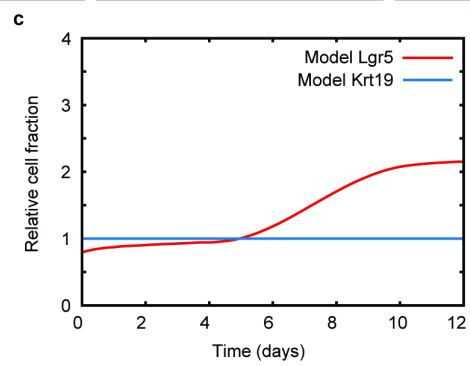

Supplement: EMS85477-supplement-fig__s8.pdf [file EMS85477-supplement-fig__s8.pdf]

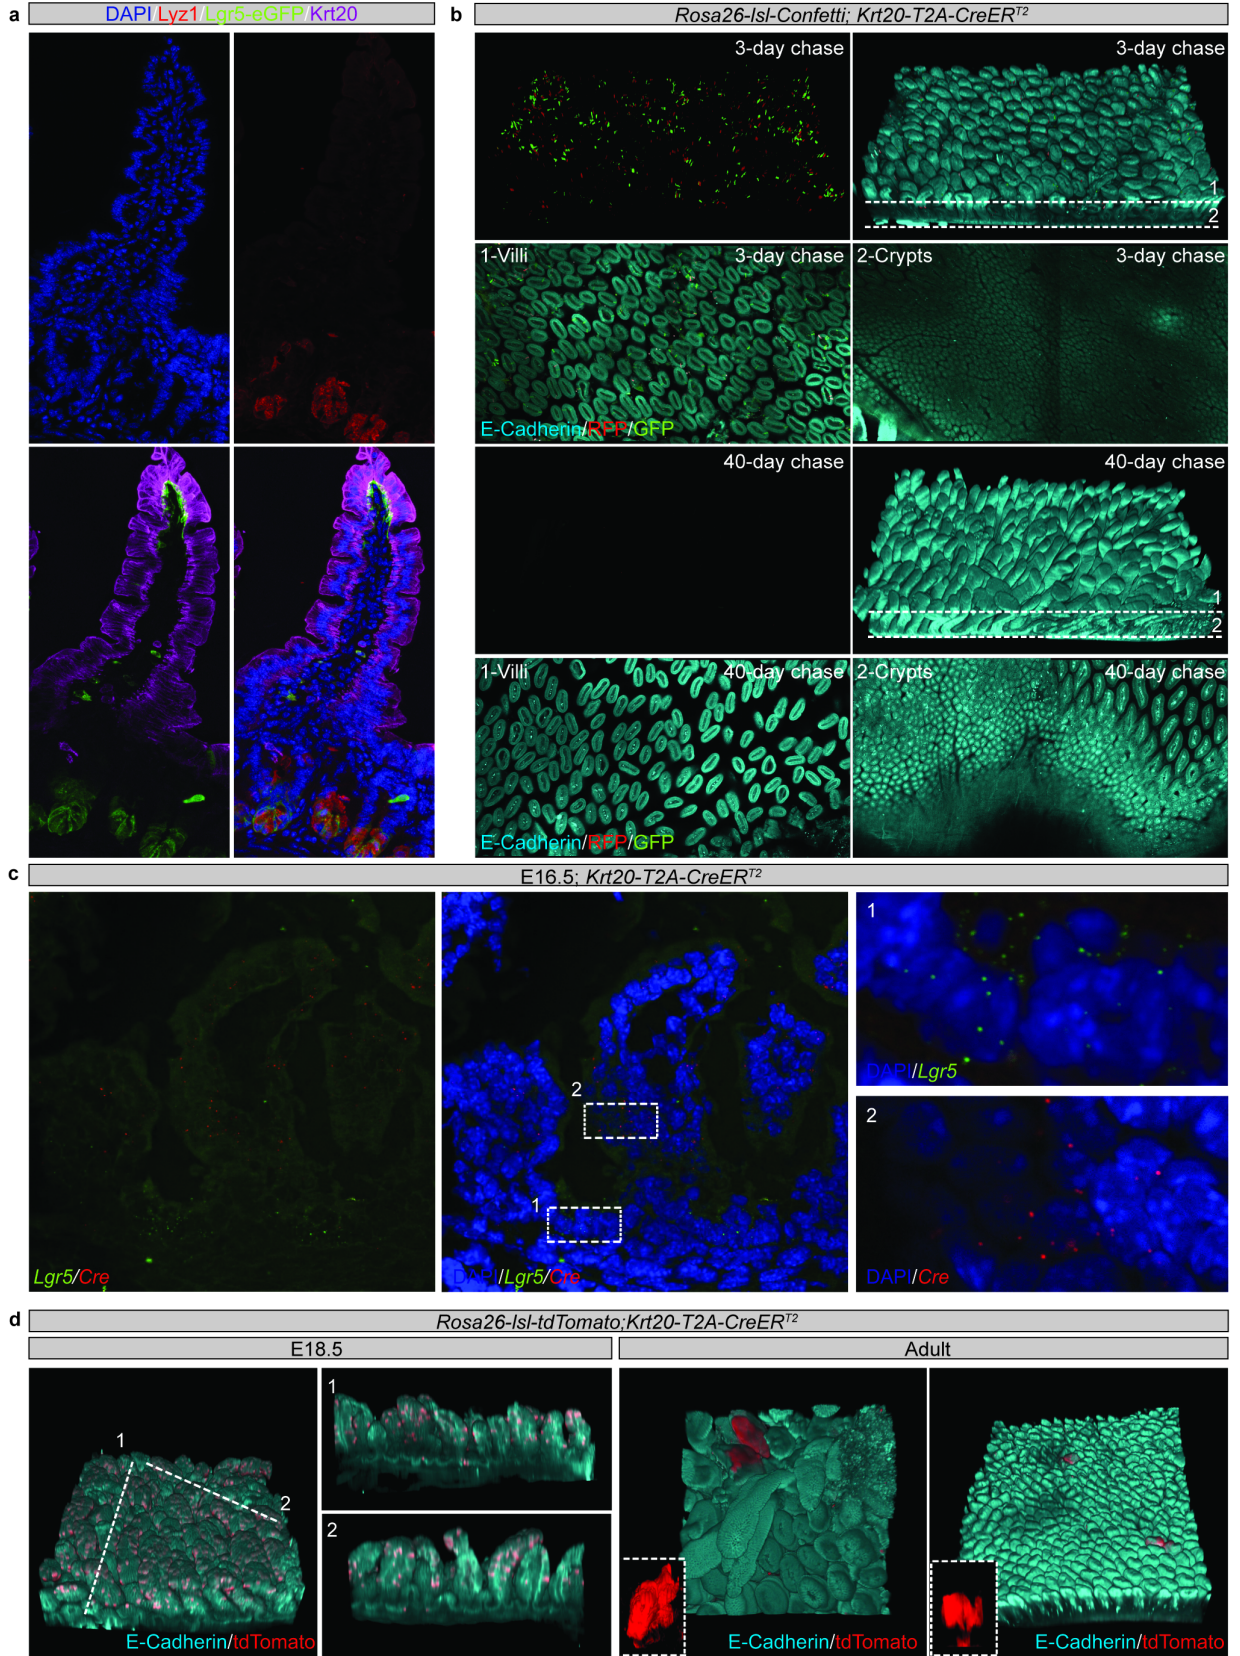

Supplement: EMS85477-supplement-fig__s9.pdf [file EMS85477-supplement-fig__s9.pdf]
